# Supplementary material for: Mathematical models for the Notch and Wnt signaling pathways and the crosstalk between them during somitogenesis
Source: PubMed Central journal article supplement (PMC3648501; doi:10.1186/1742-4682-10-27), 2013-04-20
Supplement: 1742-4682-10-27-S2.pdf [file 1742-4682-10-27-S2.pdf]

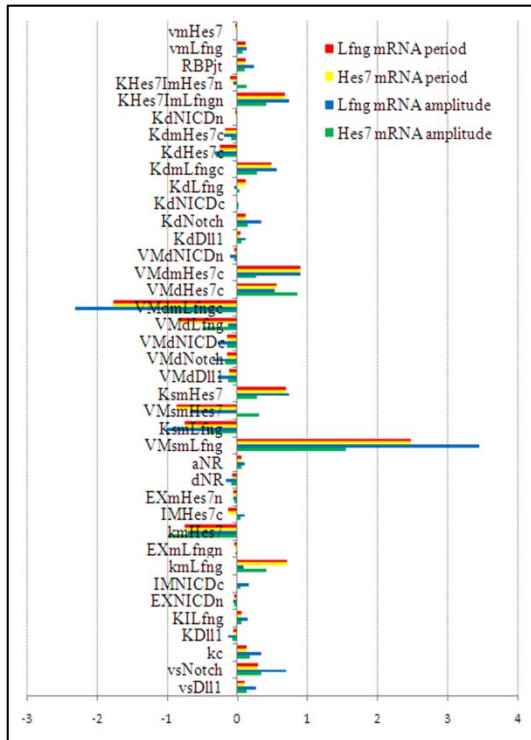

Figure S1. The parameter sensitivity of the single Notch pathway model under the perturbation level 1%.

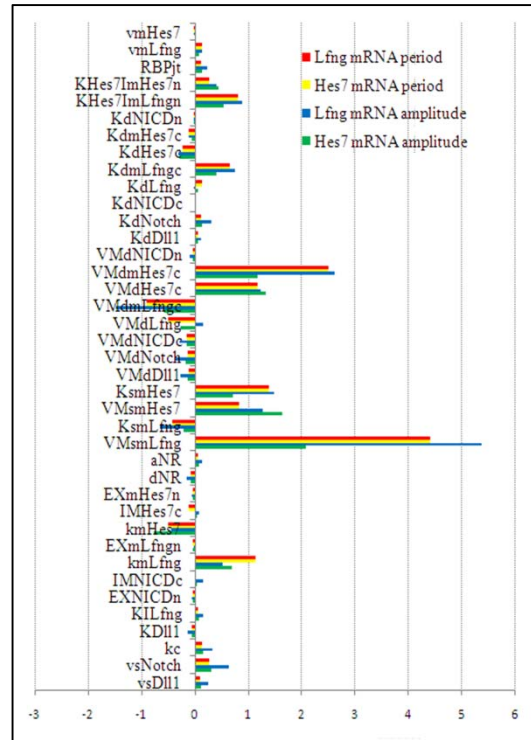

Figure S2. The parameter sensitivity of the single Notch pathway model under the perturbation level 10%.

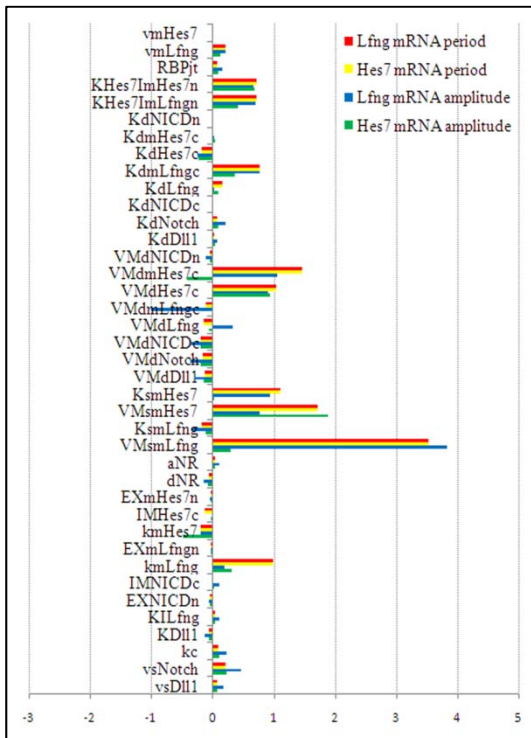

Figure S3. The parameter sensitivity of the single Notch pathway model under the perturbation level 50%.

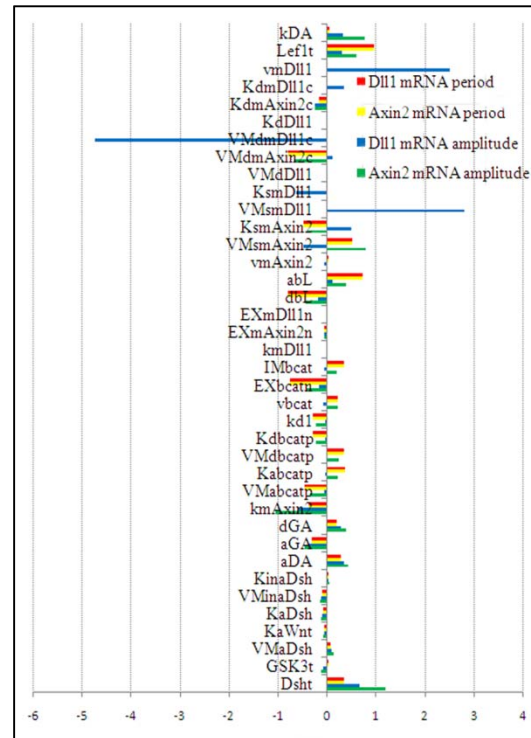

Figure S4. The parameter sensitivity of the single Wnt pathway model under the perturbation level 1%.

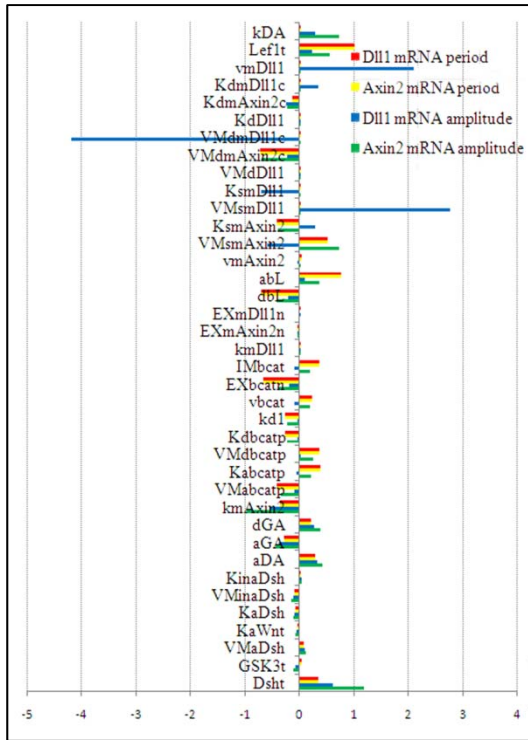

Figure S5. The parameter sensitivity of the single Wnt pathway model under the perturbation level 10%.

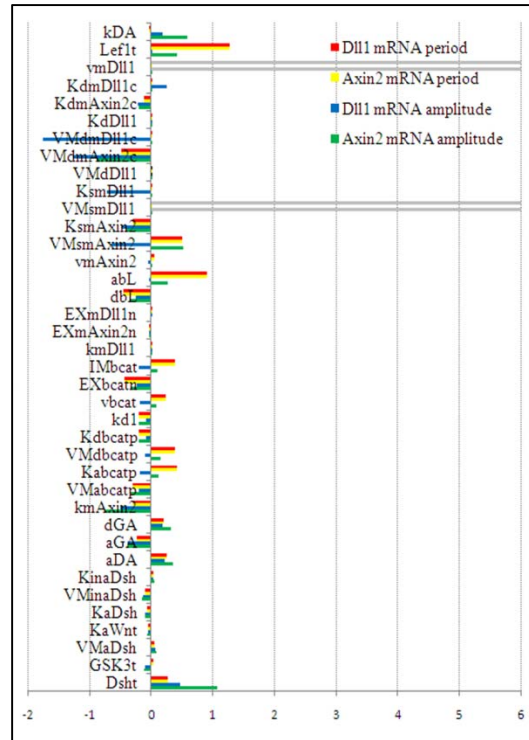

Figure S6. The parameter sensitivity of the single Wnt pathway model under the perturbation level 50%.

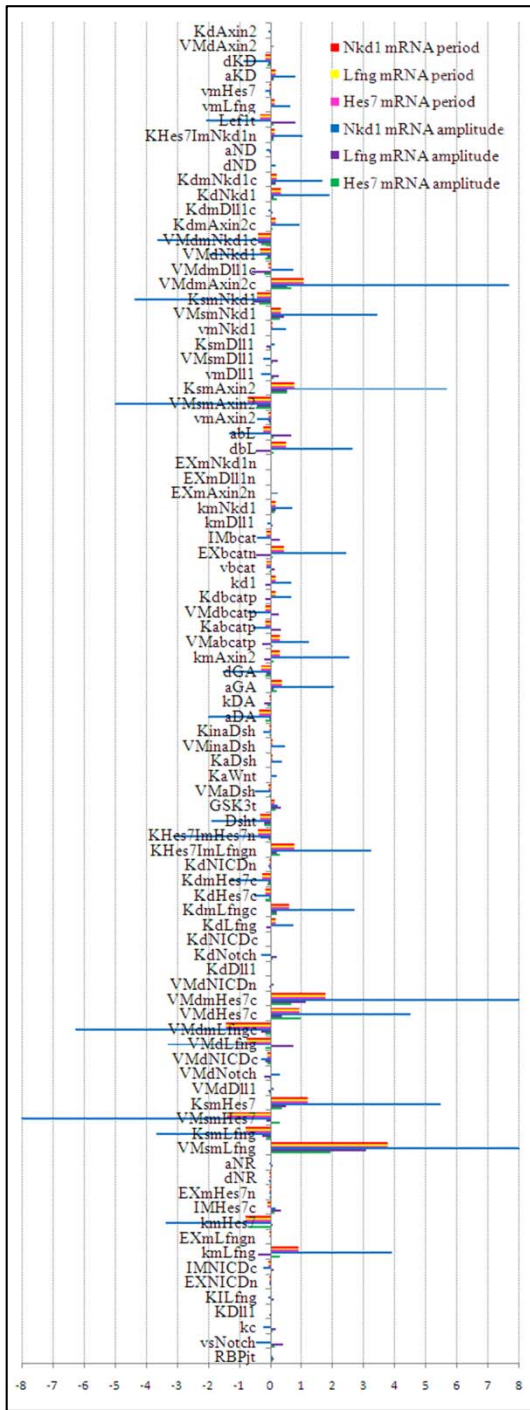

Figure S7. The parameter sensitivity of the combined model taking the genes oscillating synchronously with Hes7 as output under the perturbation level 1%.

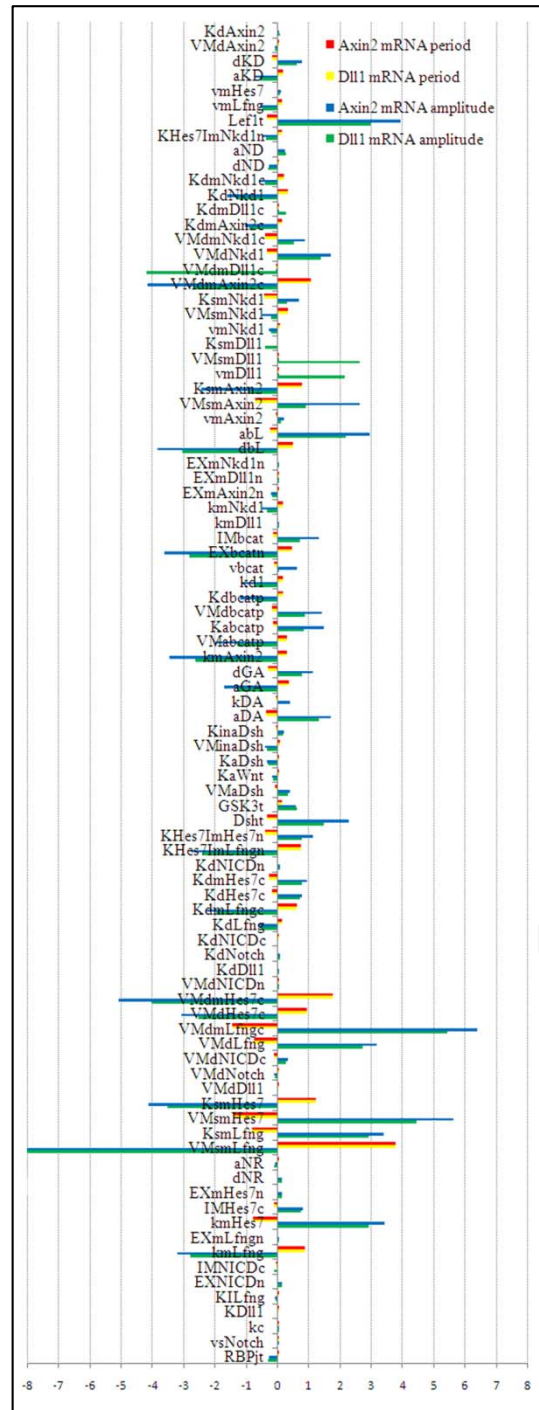

Figure S8. The parameter sensitivity of the combined model taking the genes oscillating synchronously with Axin2 as output under the perturbation level 1%.

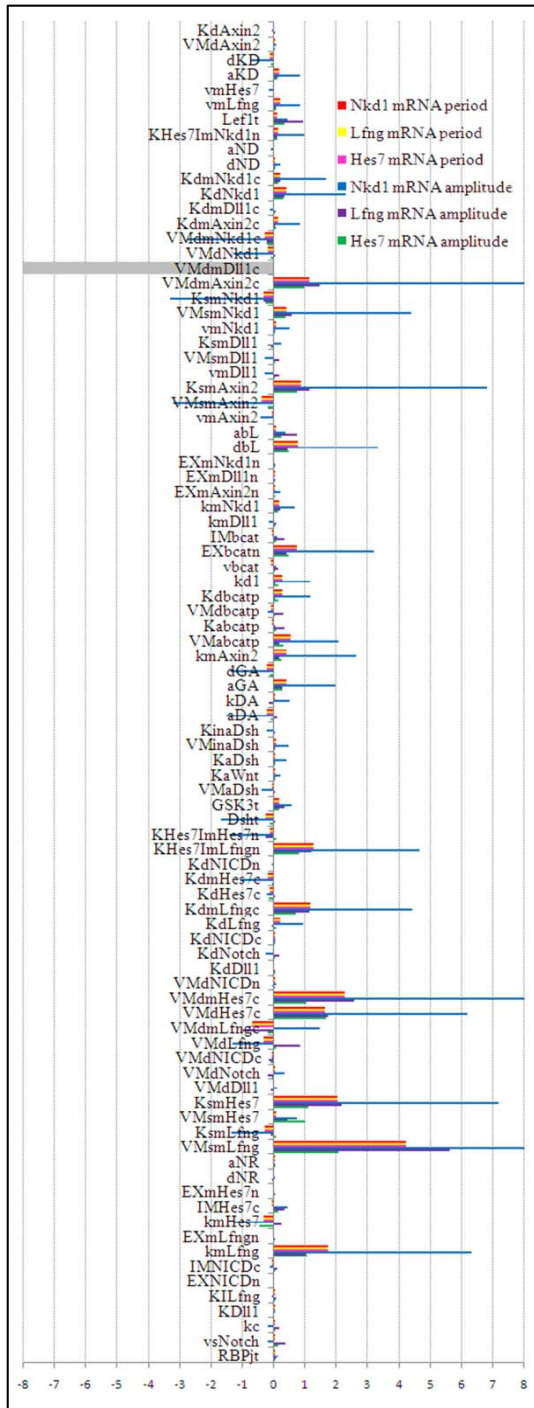

Figure S9. The parameter sensitivity of the combined model taking the genes oscillating synchronously with Hes7 as output under the perturbation level 10%.

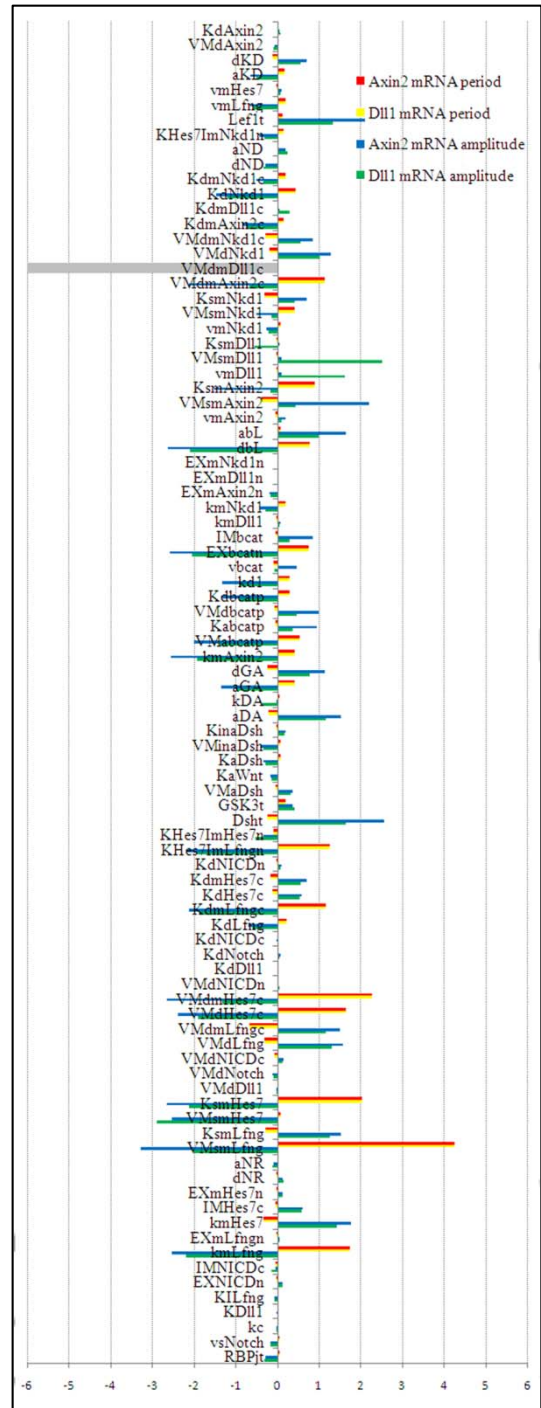

Figure S10. The parameter sensitivity of the combined model taking the genes oscillating synchronously with Axin2 as output under the perturbation level 10%.



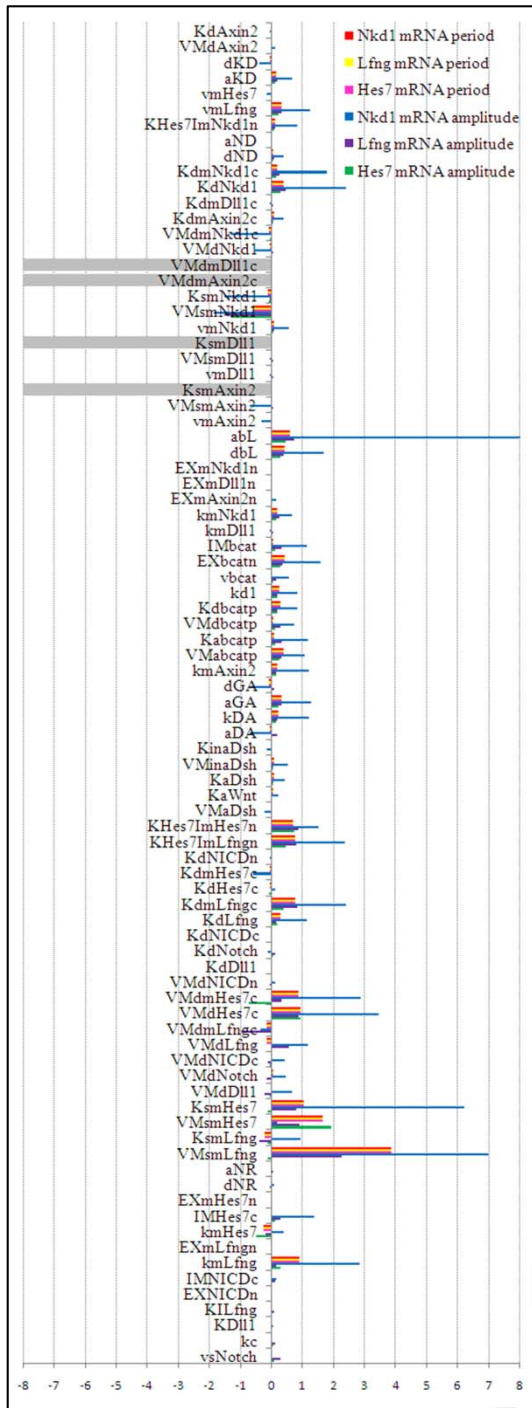

Figure S11. The parameter sensitivity of the combined model taking the genes oscillating synchronously with Hes7 as output under the perturbation level 50%.

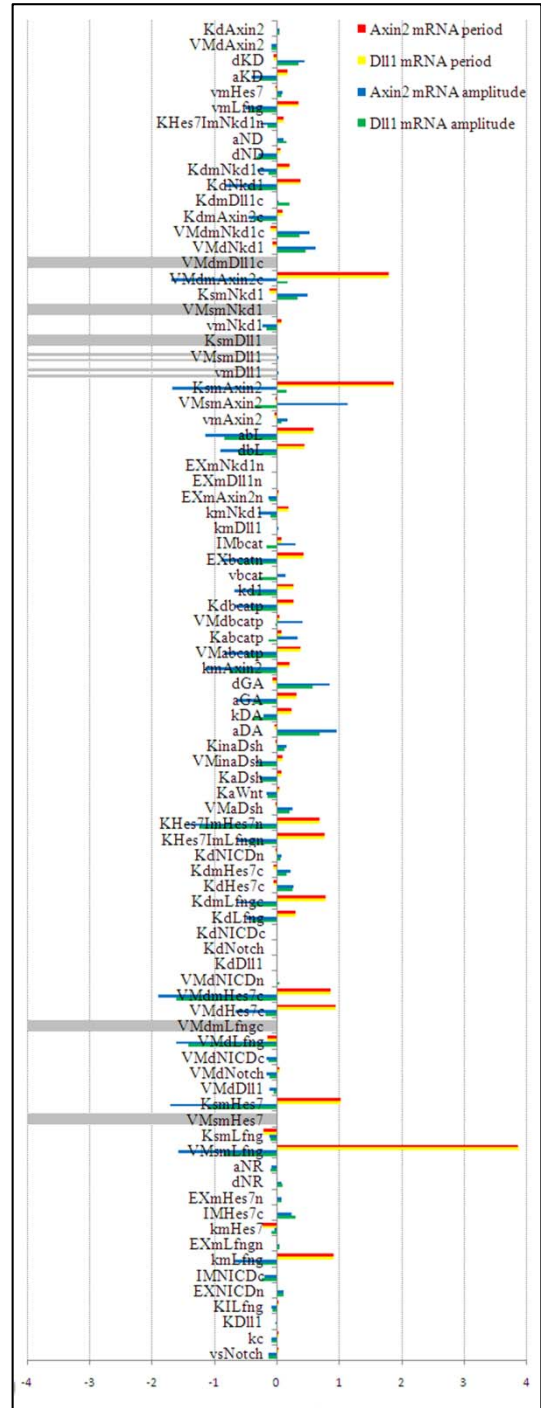

Figure S12. The parameter sensitivity of the combined model taking the genes oscillating synchronously with Axin2 as output under the perturbation level 50%.

Table S7. The parameters to which the oscillating periods or amplitudes of Notch target genes are significantly sensitive in different perturbation levels in the single Notch pathway model.

| gene | Sensitivity type | Perturbation intensity                               |                                                                                                            |                                                                                        |
|------|------------------|------------------------------------------------------|------------------------------------------------------------------------------------------------------------|----------------------------------------------------------------------------------------|
|      |                  | 1%                                                   | 10%                                                                                                        | 50%                                                                                    |
| Lfng | period           | VMsmLfng(2.48)<br>VMdmLfngc(-1.76)                   | VMsmLfng(4.4)<br>VMdmHes7c(2.5)<br>KsmHes7(1.38)<br>VMdHes7c(1.16)<br>kmLfng(1.13)                         | VMsmLfng(3.52)<br>VMsmHes7(1.72)<br>VMdmHes7c(1.47)<br>KsmHes7(1.11)<br>VMdHes7c(1.04) |
|      | amplitude        | VMsmLfng(3.45)<br>VMdmLfngc(-2.31)<br>KsmLfng(-1.01) | VMsmLfng(5.36)<br>VMdmHes7c(2.62)<br>VMdmLfngc(-1.49)<br>KsmHes7(1.48)<br>VMsmHes7(1.27)<br>VMdHes7c(1.24) | VMsmLfng(3.83)<br>VMdmHes7c(1.07)<br>VMdmLfngc(-1)                                     |
| Hes7 | period           | VMsmLfng(2.48)<br>VMdLfngc(-1.76)                    | VMsmLfng(2.08)<br>VMdmHes7c(2.5)<br>VMdHes7c(1.16)<br>KsmHes7(1.38)<br>kmLfng(1.13)                        | VMsmLfng(3.52)<br>VMsmHes7(1.72)<br>VMdmHes7c(1.47)<br>KsmHes7(1.11)<br>VMdHes7c(1.04) |
|      | amplitude        | VMsmLfng(1.55)<br>VMdmLfngc(-1.04)                   | VMsmLfng(4.4)<br>VMsmHes7(1.64)<br>VMdHes7c(1.33)<br>VMdmHes7c(1.17)                                       | VMsmHes7(1.89)                                                                         |

Table S8. The parameters to which the oscillating periods or amplitudes of Wnt target genes are significantly sensitive in different perturbation levels in the single Wnt pathway model.

| gene  | Sensitivity type | Perturbation intensity                            |                                                  |                                       |
|-------|------------------|---------------------------------------------------|--------------------------------------------------|---------------------------------------|
|       |                  | 1%                                                | 10%                                              | 50%                                   |
| Dll1  | period           |                                                   | Lef1t(1.02)                                      | Lef1t(1.27)                           |
|       | amplitude        | VMdmDll1c(-4.74)<br>VMsDll1(2.81)<br>vmDll1(2.52) | VMdmDll1c(-4.17)<br>VMsDll1(2.77)<br>vmDll1(2.1) | VMdmDll1c(-1.75)<br>VMdmAxin2c(-1.27) |
| Axin2 | period           |                                                   | Lef1t(1.02)                                      | Lef1t(1.27)                           |
|       | amplitude        | Dsht(1.21)<br>kmAxin2(-1.04)                      | Dsht(1.18)                                       | Dsht(1.07)                            |

Table S9. The parameters to which the oscillating periods or amplitudes of target genes are significantly sensitive in different perturbation levels in the combined model.

| gene        | Sensitivity type | Perturbation intensity                                                                                        |                                                                                                                                                                   |                                                   |
|-------------|------------------|---------------------------------------------------------------------------------------------------------------|-------------------------------------------------------------------------------------------------------------------------------------------------------------------|---------------------------------------------------|
|             |                  | 1%                                                                                                            | 10%                                                                                                                                                               | 50%                                               |
| <b>Lfng</b> | <b>period</b>    | VMsmLfng(3.78)<br>VMdmHes7c(1.76)<br>VMdmLfngc(-1.45)<br>VMsmHes7(-1.41)<br>KsmHes7(1.22)<br>VMdmAxin2c(1.05) | VMsmLfng(4.24)<br>VMdmHes7c(2.28)<br>KsmHes7c(2.03)<br>kmLfng(1.72)<br>VMdHes7c(1.64)<br>KHes7ImLfngn(1.26)<br>KdmLfngc(1.16)<br>VMdmAxin2c(1.14)                 | VMsmLfng(3.88)<br>VMsmHes7(1.64)<br>KsmHes7(1.02) |
|             | <b>amplitude</b> | VMsmLfng(3.07)<br>VMdmDll1c(-1.84)<br>VMdLfng(1.28)<br>Lef1t(1.27)<br>kmLfng(-1.12)<br>VMsmHes7(1.04)         | VMsmLfng(5.61)<br>VMdmHes7c(2.56)<br>KsmHes7(2.19)<br>VMdHes7c(1.74)<br>VMdmAxin2c(1.48)<br>KHes7ImLfngn(1.2)<br>KsmAxin2(1.16)<br>KdmLfngc(1.13)<br>kmLfng(1.05) | VMsmLfng(2.27)<br>VMsmNkd1(-1.52)                 |
| <b>Hes7</b> | <b>period</b>    | VMsmLfng(3.78)<br>VMdmHes7c(1.76)<br>VMdmLfngc(-1.45)<br>VMsmHes7(-1.41)<br>KsmHes7(1.22)<br>VMdmAxin2c(1.05) | VMsmLfng(4.24)<br>VMdmHes7c(2.28)<br>KsmHes7c(2.03)<br>kmLfng(1.72)<br>VMdHes7c(1.64)<br>KHes7ImLfngn(1.26)<br>KdmLfngc(1.16)<br>VMdmAxin2c(1.14)                 | VMsmLfng(3.88)<br>VMsmHes7(1.64)<br>KsmHes7(1.02) |
|             | <b>amplitude</b> | VMsmLfng(1.94)<br>VMdmHes7c(1.15)                                                                             | VMsmLfng(2.09)<br>VMdHes7c(1.68)<br>KsmHes7(1.13)<br>kmLfng(1.09)<br>VMdmHes7c(1.03)                                                                              | VMsmHes7(1.9)<br>VMsmNkd1(-1.31)                  |
| <b>Nkd1</b> | <b>period</b>    | VMsmLfng(3.78)<br>VMdmHes7c(1.76)<br>VMdmLfngc(-1.45)<br>VMsmHes7(-1.41)<br>KsmHes7(1.22)<br>VMdmAxin2c(1.05) | VMsmLfng(4.24)<br>VMdmHes7c(2.28)<br>KsmHes7c(2.03)<br>kmLfng(1.72)<br>VMdHes7c(1.64)<br>KHes7ImLfngn(1.26)<br>KdmLfngc(1.16)                                     | VMsmLfng(3.88)<br>VMsmHes7(1.64)<br>KsmHes7(1.02) |

|             |                  |                                                                                                                                                                                                                                                                                                                                                                                                                                                                                                                                                                                                       |                                                                                                                                                                                                                                                                                                                                                                                                                                                                                                                                         |                                                                                                                                                                                                                                                                                                                                                                                                                                         |
|-------------|------------------|-------------------------------------------------------------------------------------------------------------------------------------------------------------------------------------------------------------------------------------------------------------------------------------------------------------------------------------------------------------------------------------------------------------------------------------------------------------------------------------------------------------------------------------------------------------------------------------------------------|-----------------------------------------------------------------------------------------------------------------------------------------------------------------------------------------------------------------------------------------------------------------------------------------------------------------------------------------------------------------------------------------------------------------------------------------------------------------------------------------------------------------------------------------|-----------------------------------------------------------------------------------------------------------------------------------------------------------------------------------------------------------------------------------------------------------------------------------------------------------------------------------------------------------------------------------------------------------------------------------------|
|             |                  |                                                                                                                                                                                                                                                                                                                                                                                                                                                                                                                                                                                                       | VMdmAxin2c(1.14)                                                                                                                                                                                                                                                                                                                                                                                                                                                                                                                        |                                                                                                                                                                                                                                                                                                                                                                                                                                         |
|             | <b>amplitude</b> | VMsmLfng(15.56)<br>VMdmHes7c(9.41)<br>VMsmHes7(-8.51)<br>VMdmAxin2c(7.68)<br>VMdmLfngc(-6.29)<br>KsmAxin2(5.67)<br>KsmHes7(5.48)<br>VMsmAxin2(-5.01)<br>VMdHes7c(4.52)<br>KsmNkd1(-4.36)<br>KsmLfng(-3.67)<br>VMdmNkd1c(-3.66)<br>VMsmNkd1(3.42)<br>kmHes7(-3.39)<br>VMdLfng(-3.32)<br>KHes7ImLfngn(3.23)<br>KHes7ImHes7n(-3.16)<br>kmLfng(3.01)<br>KdmLfngc(2.7)<br>dbL(2.65)<br>kmAxin2(2.55)<br>EXbcatn(2.43)<br>aGA(2.04)<br>aDA(-2)<br>VMdNkd1(-1.98)<br>KdNkd1(1.91)<br>KdmNkd1c(1.65)<br>dGA(-1.55)<br>abL(-1.33)<br>KdmHes7c(-1.32)<br>VMabcatp(1.24)<br>KdmNkd1c(1.09)<br>KHes7ImNkd1n(1.02) | VMsmLfng(12.13)<br>VMdmHes7c(10.79)<br>VMdmAxin2c(8.8)<br>KsmHes7(7.18)<br>kmLfng(6.32)<br>VMdHes7c(6.19)<br>KHes7ImLfngn(4.66)<br>KdmLfngc(4.42)<br>VMsmNkd1(4.4)<br>dbL(3.34)<br>KsmNkd1(-3.29)<br>EXbcatn(3.2)<br>VMsmAxin2(-3.19)<br>VMdmNkd1c(-2.78)<br>kmAxin2(2.63)<br>KdNkd1(2.31)<br>VMabcatp(2.09)<br>aGA(1.99)<br>KdmNkd1c(1.68)<br>aDA(-1.52)<br>VMdmLfngc(1.48)<br>KHes7ImHes7n(-1.41)<br>dGA(-1.36)<br>KsmLfng(-1.36)<br>VMdLfng(-1.3)<br>kmHes7(-1.29)<br>VMdNkd1(-1.27)<br>Kdbcatp(1.18)<br>kd1(1.17)<br>KsmAxin2(1.16) | abL(10.16)<br>VMsmLfng(7.01)<br>KsmHes7(6.21)<br>VMdHes7c(3.44)<br>VMdmHes7c(2.87)<br>kmLfng(2.83)<br>KdNkd1(2.41)<br>KdmLfngc(2.38)<br>KHes7ImLfngn(2.38)<br>VMsmNkd1(-1.85)<br>KdmNkd1c(1.78)<br>dbL(1.68)<br>EXbcatn(1.58)<br>KHes7ImHes7n(1.51)<br>KsmNkd1(-1.51)<br>VMdmNkd1c(-1.31)<br>aGA(1.29)<br>vmLfng(1.23)<br>kDA(1.22)<br>kmAxin2(1.2)<br>VMdLfng(1.18)<br>Kabcatp(1.18)<br>KdLfng(1.14)<br>IMbcap(1.13)<br>VMabcatp(1.07) |
| <b>Dll1</b> | <b>period</b>    | VMsmLfng(3.78)<br>VMdmHes7c(1.76)<br>VMdmLfngc(-1.45)<br>VMsmHes7(-1.41)<br>KsmHes7(1.22)<br>VMdmAxin2c(1.05)                                                                                                                                                                                                                                                                                                                                                                                                                                                                                         | VMsmLfng(4.24)<br>VMdmHes7c(2.28)<br>KsmHes7c(2.03)<br>kmLfng(1.72)<br>VMdHes7c(1.64)<br>KHes7ImLfngn(1.26)<br>KdmLfngc(1.16)<br>VMdmAxin2c(1.14)                                                                                                                                                                                                                                                                                                                                                                                       | VMsmLfng(3.88)<br>VMsmHes7(1.64)<br>KsmHes7(1.02)                                                                                                                                                                                                                                                                                                                                                                                       |
|             | <b>amplitude</b> | VMsmLfng(-9.58)<br>VMdmLfngc(5.43)                                                                                                                                                                                                                                                                                                                                                                                                                                                                                                                                                                    | VMsmHes7(-2.9)<br>VMsDll1(2.5)                                                                                                                                                                                                                                                                                                                                                                                                                                                                                                          | VMdmHes7c(-1.61)<br>KHes7Imhes7n(-1.24)                                                                                                                                                                                                                                                                                                                                                                                                 |



|              |                  |                                                                                                                                                                                                                                                                                                                                                                                                            |                                                                                                                                                                                                                                                                                                                                           |                                                                                                                                                  |
|--------------|------------------|------------------------------------------------------------------------------------------------------------------------------------------------------------------------------------------------------------------------------------------------------------------------------------------------------------------------------------------------------------------------------------------------------------|-------------------------------------------------------------------------------------------------------------------------------------------------------------------------------------------------------------------------------------------------------------------------------------------------------------------------------------------|--------------------------------------------------------------------------------------------------------------------------------------------------|
|              |                  | VMsmHes7(4.45)<br>dbL(-3.06)<br>abL(2.18)<br>KsmHes7(-3.52)<br>EXbcatn(-2.83)<br>VMdmDll1c(-4.2)<br>VMdmAxin2c(-2.68)<br>VMdmHes7c(-4.01)<br>KsmLfng(2.9)<br>kmHes7(2.92)<br>VMdLfng(2.72)<br>kmAxin2(-2.64)<br>VMsmDll1(2.62)<br>VMdHes7c(-2.54)<br>kmLfng(-2.79)<br>VMabcatp(-1.29)<br>KHes7ImLfngn(-2.41)<br>vmDll1(2.13)<br>aDA(1.32)<br>KdmLfngc(-1.97)<br>aGA(-1.3)<br>VMdNkd1(1.4)<br>KdNkd1(-1.32) | kmLfng(-2.2)<br>KsmHes7(-2.12)<br>dbL(-2.11)<br>EXbcatn(-2.05)<br>VMsmLfng(-2.03)<br>VMdmLfngc(1.15)<br>KHes7ImLfngn(-1.96)<br>kmAxin2(-1.94)<br>VMdHes7c(-1.91)<br>KdmLfngc(-1.89)<br>vmDll1(1.62)<br>kmHes7(1.42)<br>VMabcatp(-1.4)<br>VMdmHes7c(-1.33)<br>VMdLfng(1.3)<br>KsmLfng(1.27)<br>KdNkd1(-1.21)<br>aDA(1.15)<br>VMdNkd1(1.02) | VMdLfng(-1.42)<br>KsmHes7(-1.09)                                                                                                                 |
| <b>Axin2</b> | <b>period</b>    | VMsmLfng(3.78)<br>VMdmHes7c(1.76)<br>VMdmLfngc(-1.45)<br>VMsmHes7(-1.41)<br>KsmHes7(1.22)<br>VMdmAxin2c(1.05)                                                                                                                                                                                                                                                                                              | VMsmLfng(4.24)<br>VMdmHes7c(2.28)<br>KsmHes7c(2.03)<br>kmLfng(1.72)<br>VMdHes7c(1.64)<br>KHes7ImLfngn(1.26)<br>KdmLfngc(1.16)<br>VMdmAxin2c(1.14)                                                                                                                                                                                         | VMsmLfng(3.88)<br>VMsmHes7(1.64)<br>KsmHes7(1.02)                                                                                                |
|              | <b>amplitude</b> | VMsmLfng(-10.8)<br>VMdmLfngc(6.38)<br>VMsmHes7(5.61)<br>abL(2.94)<br>dbL(-3.85)<br>VMdmAxin2c(-4.16)<br>EXbcatn(-3.61)<br>VMdmHes7c(-5.08)<br>KsmHes7(-4.13)<br>KsmLfng(3.38)<br>kmHes7(3.42)<br>kmAxin2(-3.46)<br>VMsmAxin2(2.63)                                                                                                                                                                         | VMsmLfng(-3.28)<br>VMdmHes7c(-2.65)<br>KsmHes7(-2.65)<br>dbL(-2.63)<br>EXbcatn(-2.57)<br>kmAxin2(-2.56)<br>VMsmHes7(-2.53)<br>kmLfng(-2.53)<br>VMdHes7c(-2.39)<br>KHes7ImLfngn(-2.2)<br>VMsmAxin2(2.19)<br>KdmLfngc(-2.13)<br>VMdmAxin2c(-2.13)                                                                                           | VMsmLfng(-1.59)<br>abL(-1.14)<br>VMdmHes7c(-1.9)<br>KHes7ImHes7n(-1.48)<br>VMdLfng(-1.62)<br>VMsmAxin2(1.14)<br>KsmHes7(-1.71)<br>kmAxin2(-1.14) |

|  |                                                                                                                                                                                                                                                                                                                                     |                                                                                                                                                                                                                              |  |
|--|-------------------------------------------------------------------------------------------------------------------------------------------------------------------------------------------------------------------------------------------------------------------------------------------------------------------------------------|------------------------------------------------------------------------------------------------------------------------------------------------------------------------------------------------------------------------------|--|
|  | VMabcatp(-2)<br>VMdLfng(3.17)<br>KsmAxin2(-2.43)<br>Kabcatp(1.47)<br>VMdHes7c(-3.07)<br>IMbcat(1.32)<br>kmLfng(-3.21)<br>VMdbcatt(1.43)<br>aDA(1.71)<br>KHes7ImLfngn(-2.76)<br>aGA(-1.7)<br>KdmLfngc(-2.26)<br>Kdbcatt(-1.18)<br>kd1(-1.18)<br>VMdNkd1(2.15)<br>dGA(1.14)<br>KdNkd1(-1.59)<br>KHes7IHes7n(1.13)<br>KdmAxin2c(-1.04) | VMabcatp(-2)<br>kmHes7(1.75)<br>abL(1.64)<br>VMdLfng(1.58)<br>KsmAxin2(-1.53)<br>KsmLfng(1.52)<br>aDA(1.51)<br>VMdmLfngc(1.49)<br>KdNkd1(-1.48)<br>aGA(-1.35)<br>Kdbcatt(-1.34)<br>kd1(-1.33)<br>VMdNkd1(1.28)<br>aGA(-1.14) |  |
|--|-------------------------------------------------------------------------------------------------------------------------------------------------------------------------------------------------------------------------------------------------------------------------------------------------------------------------------------|------------------------------------------------------------------------------------------------------------------------------------------------------------------------------------------------------------------------------|--|
