# Supplementary material for: Mathematical models for the Notch and Wnt signaling pathways and the crosstalk between them during somitogenesis
Source: PubMed Central journal article supplement (PMC3648501; doi:10.1186/1742-4682-10-27), 2013-04-20
Supplement: 1742-4682-10-27-S4.pdf [file 1742-4682-10-27-S4.pdf]

## The algorithm pseudocode of parameter learning algorithm

1. Initialize the control parameters of the algorithm:  $popCount$ ,  $maxIter$ ,  $Nc$ ,  $\delta$ ,  $\theta$ ,  $c1$ ,  $c2$ ,  $w$ ,  $v_{max}$  and  $v_{min}$ .

2. Random initialize the population  $P$  of the PSO.

3. Calculate the fitness value of each particle and save the values to  $f$ .

If it is the first iteration then  $T = \max(f)$

4. Update the best value of each particle  $fpBest$  and the best particle  $pBest$ .

For each particle:

(1) if current value  $f < fpBest$  then  $fpBest \leftarrow f$ ,  $pBest \leftarrow p$ ;

(2) else if  $f > pBest$  then:

a.  $\Delta S \leftarrow f - fpBest$ ;

b.  $s \leftarrow \exp(-\Delta S/T)$ ;

c.  $r \leftarrow$  random value greater than 0 and less than 1;

d. if  $r < s$  then  $fpBest \leftarrow f$ ,  $pBest \leftarrow p$ ;

5. Update the global best value  $fgBest$  and the best particle  $gBest$ .

(1) If minimum value of all current values  $\min(fpBest) < fgBest$  then  $fgBest \leftarrow$

$\min(fpBest)$ ,  $gBest \leftarrow pBest$  who has the minimum value;

(2) Else if  $\min(fpBest) > fgBest$  then:

a.  $\Delta S \leftarrow \min(fpBest) - fgBest$ ;

b.  $s \leftarrow \exp(-\Delta S/T)$ ;

c.  $r \leftarrow$  random value greater than 0 and less than 1;

d. if  $r < s$  then  $fgBest \leftarrow \min(fpBest)$ ,  $gBest \leftarrow pBest$  who has the minimum

value;

6. Random update the particles that are the same as the one that has the best value.

For each particle  $p$ :

If  $p=gBest$  then:

- a.  $vv \leftarrow$  random value between  $v_{max}$  and  $v_{min}$ ;

- b.  $p \leftarrow p+vv$ ;

7. Update  $P$  using the  $pBest$  and  $gBest$ .

- (1)  $r1 \leftarrow$  random value greater than 0 and less than 1;

- (2)  $r2 \leftarrow$  random value greater than 0 and less than 1;

- (3)  $v \leftarrow v*w+c1*r1*(pBest-P)+c2*r2*(gBest-P)$ ;

- (4) if  $v > v_{max}$  then  $v \leftarrow v_{max}$ ; if  $v < v_{min}$  then  $v \leftarrow v_{min}$ ;

- (5)  $P \leftarrow P+v$ ;

8. Check the evolution of  $fpBest$ :

If the current iteration counts  $iter \geq Nc$  and  $|fpBest(i)-fpBest(i-1)| < \delta$  for each

$i=iter, iter-1, \dots, iter-Nc+1$  then:

- a.  $vv \leftarrow$  random value between  $v_{max}$  and  $v_{min}$ ;

- b. Random select some particles  $pp, pp \leftarrow pp+vv$ ;

9. Update the temperature  $T$ .

If the iteration passes the half of remaining iteration counts when  $T$  is updated last

time then  $T \leftarrow T/2$ ;

10. If  $fgBest < \theta$  then go to 12.

11. If  $iter > maxIter$  then GOTO step 12, else GOTO step 3.

12. Reinitialize the control parameters of the algorithm:  $maxIter$ ,  $T$ ,  $updateNeiCount$ ,  $neiCount$ ,  $v_{max}$  and  $v_{min}$ .
13. Initialize the population  $P$  of the PSO using the result of global search,  $gBest$ .
14. Calculate the fitness value of each particle.
15. Update the best value of each particle  $fpBest$  and the best particle  $pBest$ .

For each particle:

(1) if current value  $f < fpBest$  then  $fpBest \leftarrow f$ ,  $pBest \leftarrow p$ ;

(2) else if  $f > pBest$  then:

a.  $\Delta S \leftarrow f - fpBest$ ;

b.  $s \leftarrow \exp(-\Delta S/T)$ ;

c.  $r \leftarrow$  random value greater than 0 and less than 1;

d. if  $r < s$  then  $fpBest \leftarrow f$ ,  $pBest \leftarrow p$ ;

16. Update the local best value of each neighbour  $flBest$  and the best particle  $lBest$  of each neighbour.

Create neighbour for each particle and for each neighbour:

(1) If minimum value of current values in this neighbour  $\min(fpBest) < flBest$  then

$flBest \leftarrow \min(fpBest)$ ,  $lBest \leftarrow pBest$  that has minimum value in the neighbour;

(2) Else if  $\min(fpBest) > flBest$  then:

a.  $\Delta S \leftarrow \min(fpBest) - flBest$ ;

b.  $s \leftarrow \exp(-\Delta S/T)$ ;

c.  $r \leftarrow$  random value greater than 0 and less than 1;

d. if  $r < s$  then  $flBest \leftarrow \min(fpBest)$ ,  $lBest \leftarrow pBest$  that has minimum value in the neighbour;

17. Output the  $fgBest$  and  $gBest$ .

(1)  $fgBest \leftarrow$  minimum value of  $flBest$ ;

(2)  $gBest \leftarrow p$  that has the best value  $fgBest$ ;

18. Update  $P$  using the  $pBest$  and  $lBest$ .

(1)  $r1 \leftarrow$  random value greater than 0 and less than 1;

(2)  $r2 \leftarrow$  random value greater than 0 and less than 1;

(3)  $v \leftarrow v*w+c1*r1*(pBest-P)+c2*r2*(lBest-P)$ ;

(4) if  $v > v_{max}$  then  $v \leftarrow v_{max}$ ; if  $v < v_{min}$  then  $v \leftarrow v_{min}$ ;

(5)  $p \leftarrow p+v$ ;

19. Check the evolution of  $fpBest$ .

If the current iteration counts  $iter \geq Nc$  and  $|fpBest(i)-fpBest(i-1)| < \delta$  for each  $i=iter, iter-1, \dots, iter-Nc+1$  then:

a.  $vv \leftarrow$  random value between  $v_{max}$  and  $v_{min}$ ;

b. Random select some particles  $pp$ ,  $pp \leftarrow pp+vv$ ;

20. Update the neighbour count  $neiCount$ .

If  $iter \bmod updateNeiCount = 0$  then  $neiCount \leftarrow neiCount+1$

21. Update the temperature  $T$ .

If the iteration passes the half of remaining iteration counts when  $T$  is updated last time then  $T \leftarrow T/2$ ;

If  $iter > maxIter$  or  $fgBest < \theta$  then output  $fgBest$  and  $gBest$ , the algorithm is over; else

GOTO step 14.
